# Supplementary material for: A nanoscale polymolybdate built by two hexavacant Keggin-type fragments via a novel {Ca6P6O38} cluster with β-sheet conformation modulation ability
Source: Royal Society of Chemistry journal article supplement (doi:10.1039/d2ce00215a), 2022-01-01
Supplement: d2ce00215a1.pdf [file d2ce00215a1.pdf]

## Supplementary Information

### A nanoscale polymolybdate builded by two hexavacant Keggin-type fragments *via* a novel {Ca<sub>6</sub>P<sub>6</sub>O<sub>38</sub>} cluster with $\beta$ -sheet conformation modulation ability

Jiai Hua,<sup>‡\*a</sup> Xueman Wei,<sup>‡<sup>d</sup></sup> Yujian Bian,<sup>‡<sup>a</sup></sup> Xiang Ma,<sup>\*ae</sup> Li Hao,<sup>b</sup> Jierui Sun,<sup>a</sup> Jingjing Fan,<sup>a</sup> Yulan Niu<sup>\*b</sup> and Yanqing Wang<sup>\*c</sup>

<sup>a</sup> Department of Chemistry and Chemical Engineering, Taiyuan Institute of Technology, Taiyuan 030008, P. R. China.

<sup>b</sup> Laboratory of Biochemistry and Pharmacy, Taiyuan Institute of Technology, Taiyuan 030008, P. R. China.

<sup>c</sup> School of Chemistry and Environmental Engineering, Yancheng Teachers University, Yancheng City, 224007, P. R. China.

<sup>d</sup> Department of Geriatrics, First affiliated Hospital of Naval Medical University, Shanghai, 200081, P. R. China.

<sup>e</sup> State Key Laboratory of Coordination Chemistry, Nanjing University, Nanjing, 210023, P. R. China.

#### 1. Supplementary Tables and Figures

**Table S1** Crystallographic data and structural refinements for CaPM

|                                           |                                                                                 |
|-------------------------------------------|---------------------------------------------------------------------------------|
| Empirical formula                         | Ca <sub>3</sub> K <sub>5</sub> Mo <sub>6</sub> NaO <sub>49</sub> P <sub>4</sub> |
| Formula weight                            | 1822.25                                                                         |
| Crystal system                            | Triclinic                                                                       |
| Space group                               | <i>P</i> -1                                                                     |
| <i>a</i> / Å                              | 12.8983(13)                                                                     |
| <i>b</i> / Å                              | 13.4856(14)                                                                     |
| <i>c</i> / Å                              | 16.2197(17)                                                                     |
| $\alpha$ / deg                            | 113.259(2)                                                                      |
| $\beta$ / deg                             | 91.930(2)                                                                       |
| $\gamma$ / deg                            | 115.225(1)                                                                      |
| <i>V</i> / Å <sup>3</sup>                 | 2274.5(4)                                                                       |
| <i>Z</i>                                  | 2                                                                               |
| <i>D<sub>c</sub></i> / g cm <sup>-3</sup> | 2.661                                                                           |
| $\mu$ / mm <sup>-1</sup>                  | 2.679                                                                           |
| <i>T</i> / K                              | 296(2)                                                                          |
| Limiting indices                          | -15 ≤ <i>h</i> ≤ 14<br>-16 ≤ <i>k</i> ≤ 14<br>-14 ≤ <i>l</i> ≤ 19               |
| Measured reflections                      | 2274.5(4)                                                                       |
| Independent reflections                   | 7980                                                                            |

|                                        |                                   |
|----------------------------------------|-----------------------------------|
| $R_{\text{int}}$                       | 0.0151                            |
| Data / restraints / parameters         | 7980 / 0 / 613                    |
| GOF on $F^2$                           | 1.062                             |
| Final $R$ indices [ $I > 2\sigma(I)$ ] | $R_1 = 0.0344$<br>$wR_2 = 0.0878$ |
| $R$ indices (all data)                 | $R_1 = 0.0397$<br>$wR_2 = 0.0931$ |
| Completeness                           | 98.6 %                            |

**Table S2** Selected bond length (Å) for CaPM

|               |          |             |          |             |          |
|---------------|----------|-------------|----------|-------------|----------|
| Mo(1)-O(25)   | 1.704(4) | Mo(1)-O(21) | 1.919(4) | Mo(1)-O(17) | 2.182(3) |
| Mo(1)-O(1)    | 1.715(4) | Mo(1)-O(14) | 1.949(3) | Mo(1)-O(33) | 2.343(3) |
| Mo(2)-O(26)   | 1.703(4) | Mo(2)-O(16) | 1.921(4) | Mo(2)-O(8)  | 2.200(3) |
| Mo(2)-O(2)    | 1.713(4) | Mo(2)-O(21) | 1.950(3) | Mo(2)-O(32) | 2.346(3) |
| Mo(3)-O(3)    | 1.706(4) | Mo(3)-O(7)  | 1.932(4) | Mo(3)-O(13) | 2.191(3) |
| Mo(3)-O(18)   | 1.715(4) | Mo(3)-O(28) | 1.935(3) | Mo(3)-O(31) | 2.356(3) |
| Mo(4)-O(19)   | 1.714(4) | Mo(4)-O(20) | 1.906(3) | Mo(4)-O(22) | 2.202(3) |
| Mo(4)-O(4)    | 1.717(4) | Mo(4)-O(28) | 1.943(3) | Mo(4)-O(31) | 2.308(3) |
| Mo(5)-O(30)   | 1.710(4) | Mo(5)-O(14) | 1.921(3) | Mo(5)-O(9)  | 2.217(3) |
| Mo(5)-O(5)    | 1.712(4) | Mo(5)-O(7)  | 1.940(4) | Mo(5)-O(33) | 2.294(3) |
| Mo(6)-O(24)   | 1.709(4) | Mo(6)-O(16) | 1.910(4) | Mo(6)-O(12) | 2.205(3) |
| Mo(6)-O(6)    | 1.719(4) | Mo(6)-O(20) | 1.950(3) | Mo(6)-O(32) | 2.298(3) |
| Ca(1)-O(15)#4 | 2.350(3) | Ca(1)-O(1W) | 2.442(4) | Ca(1)-O(34) | 2.547(4) |
| Ca(1)-O(12)   | 2.382(4) | Ca(1)-O(23) | 2.527(4) | Ca(1)-O(20) | 2.729(4) |
| Ca(1)-O(22)   | 2.403(4) | Ca(1)-O(10) | 2.533(4) | Ca(2)-O(23) | 2.558(4) |
| Ca(2)-O(2W)   | 2.355(5) | Ca(2)-O(17) | 2.422(4) | Ca(2)-O(15) | 2.587(4) |
| Ca(2)-O(10)#4 | 2.360(3) | Ca(2)-O(34) | 2.539(4) | Ca(2)-O(21) | 2.648(4) |
| Ca(2)-O(8)    | 2.421(4) | Ca(3)-O(13) | 2.406(4) | Ca(3)-O(10) | 2.532(4) |
| Ca(3)-O(23)#4 | 2.353(3) | Ca(3)-O(9)  | 2.431(4) | Ca(3)-O(34) | 2.545(4) |
| Ca(3)-O(3W)   | 2.369(4) | Ca(3)-O(15) | 2.499(4) | Ca(3)-O(7)  | 2.751(4) |
| P(1)-O(34)    | 1.532(3) | P(1)-O(31)  | 1.536(4) | P(2)-O(11)  | 1.510(4) |
| P(1)-O(33)    | 1.540(4) | P(1)-O(32)  | 1.541(4) | P(2)-O(15)  | 1.550(4) |
| P(2)-O(17)    | 1.549(4) | P(3)-O(29)  | 1.503(4) | P(3)-O(13)  | 1.550(4) |
| P(2)-O(9)     | 1.554(4) | P(3)-O(10)  | 1.546(3) | P(3)-O(22)  | 1.551(4) |
| P(4)-O(27)    | 1.520(4) | P(4)-O(23)  | 1.545(3) |             |          |
| P(4)-O(8)     | 1.542(4) | P(4)-O(12)  | 1.548(4) |             |          |

Symmetry codes: #4 -x,-y+2,-z+1

**Table S3** Bond valence and  $\Sigma s$  of Mo, P, and Ca in CaPM

| Bond        | Valence | Bond        | Valence | Bond        | Valence | Atom  | $\Sigma s$ |
|-------------|---------|-------------|---------|-------------|---------|-------|------------|
| Mo(1)-O(25) | 1.764   | Mo(1)-O(21) | 0.958   | Mo(1)-O(17) | 0.452   |       |            |
| Mo(1)-O(1)  | 1.709   | Mo(1)-O(14) | 0.877   | Mo(1)-O(33) | 0.282   | Mo(1) | 6.041      |
| Mo(2)-O(26) | 1.789   | Mo(2)-O(16) | 0.944   | Mo(2)-O(8)  | 0.428   |       |            |
| Mo(2)-O(2)  | 1.719   | Mo(2)-O(21) | 0.877   | Mo(2)-O(32) | 0.281   | Mo(2) | 6.038      |
| Mo(3)-O(3)  | 1.769   | Mo(3)-O(7)  | 0.923   | Mo(3)-O(13) | 0.439   |       |            |
| Mo(3)-O(18) | 1.709   | Mo(3)-O(28) | 0.912   | Mo(3)-O(31) | 0.275   | Mo(3) | 6.028      |
| Mo(4)-O(19) | 1.719   | Mo(4)-O(20) | 0.991   | Mo(4)-O(22) | 0.426   |       |            |
| Mo(4)-O(4)  | 1.709   | Mo(4)-O(28) | 0.894   | Mo(4)-O(31) | 0.312   | Mo(4) | 6.051      |
| Mo(5)-O(30) | 1.738   | Mo(5)-O(14) | 0.952   | Mo(5)-O(9)  | 0.409   |       |            |
| Mo(5)-O(5)  | 1.729   | Mo(5)-O(7)  | 0.899   | Mo(5)-O(33) | 0.324   | Mo(5) | 6.052      |
| Mo(6)-O(24) | 1.738   | Mo(6)-O(16) | 0.980   | Mo(6)-O(12) | 0.422   |       |            |
| Mo(6)-O(6)  | 1.689   | Mo(6)-O(20) | 0.877   | Mo(6)-O(32) | 0.322   | Mo(6) | 6.029      |
| Ca(1)-O(15) | 0.339   | Ca(1)-O(22) | 0.298   | Ca(1)-O(23) | 0.220   |       |            |
| Ca(1)-O(12) | 0.313   | Ca(1)-O(1W) | 0.271   | Ca(1)-O(10) | 0.218   |       |            |
| Ca(1)-O(34) | 0.209   | Ca(1)-O(20) | 0.134   |             |         | Ca(1) | 2.001      |
| Ca(2)-O(2W) | 0.334   | Ca(2)-O(8)  | 0.285   | Ca(2)-O(34) | 0.214   |       |            |
| Ca(2)-O(10) | 0.330   | Ca(2)-O(17) | 0.285   | Ca(2)-O(23) | 0.204   |       |            |
| Ca(2)-O(15) | 0.189   | Ca(2)-O(21) | 0.162   |             |         | Ca(2) | 2.003      |
| Ca(3)-O(23) | 0.335   | Ca(3)-O(13) | 0.295   | Ca(3)-O(15) | 0.236   |       |            |
| Ca(3)-O(3W) | 0.325   | Ca(3)-O(9)  | 0.277   | Ca(3)-O(10) | 0.218   |       |            |
| Ca(3)-O(34) | 0.210   | Ca(3)-O(7)  | 0.127   |             |         | Ca(3) | 2.023      |
| P(1)-O(34)  | 1.256   | P(1)-O(31)  | 1.244   |             |         |       |            |
| P(1)-O(33)  | 1.244   | P(1)-O(32)  | 1.228   |             |         | P(1)  | 4.972      |
| P(2)-O(11)  | 1.327   | P(2)-O(17)  | 1.204   |             |         |       |            |
| P(2)-O(15)  | 1.207   | P(2)-O(19)  | 1.191   |             |         | P(2)  | 4.930      |
| P(3)-O(29)  | 1.361   | P(3)-O(13)  | 1.201   |             |         |       |            |
| P(3)-O(10)  | 1.210   | P(3)-O(22)  | 1.198   |             |         | P(3)  | 4.969      |
| P(4)-O(27)  | 1.304   | P(4)-O(23)  | 1.219   |             |         |       |            |

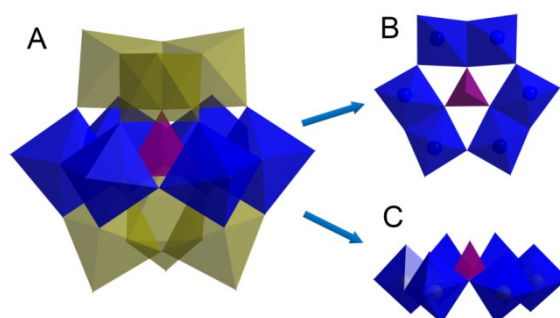

**Fig. S1** The anatomical view of the hexavacant building block of  $[\text{PMo}_6\text{O}_{28}]^{15-}$  (B and C) derived from B- $\alpha$ -Keggin-type polyanion (A).

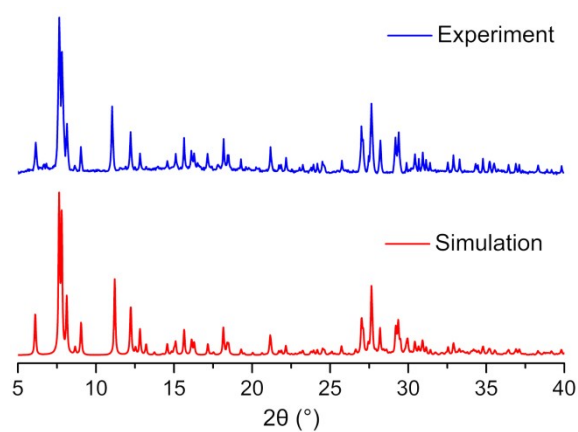

**Fig. S2** Comparison of the experimental and simulated PXRD patterns of CaPM.

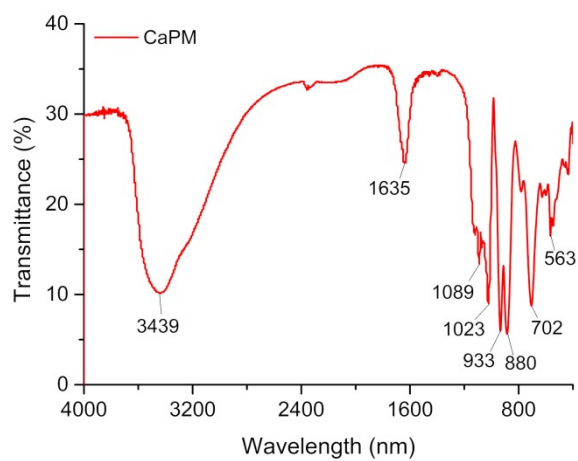

**Fig. S3** IR spectrum for CaPM.

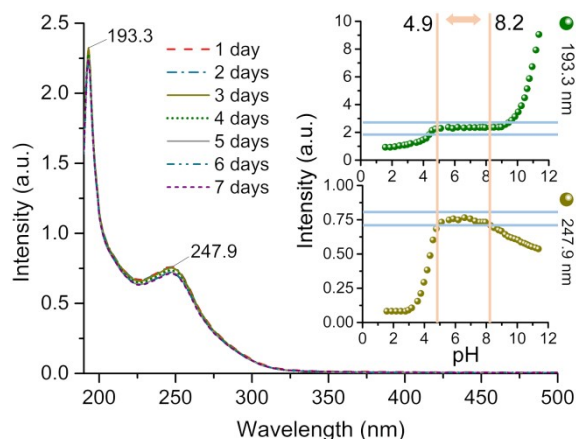

**Fig. S4** UV-Vis spectra of CaPM in deionized water for 1–7 days; and pH stability of CaPM (inset).

As shown in Fig. S5, the TGA curve of CaPM displays two stages of weight loss, giving a total loss of 14.92 % in the temperature range of 25–300 °C. The first stage from 25 to 150 °C is attributed to the loss of twenty four lattice water molecules, and the observed weight loss 11.87 % is consistent with the calculated value 11.69 %. The second stage with the weight loss of 3.05 % occurs between 210 and 285 °C, which may be assigned to the removal of six structural water molecule (calcd. 2.92 %).

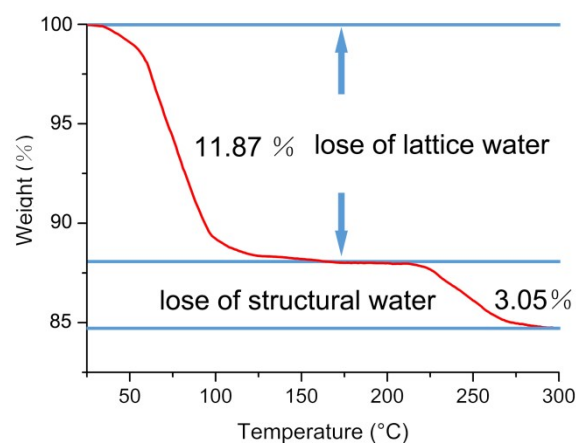

**Fig. S5** TGA curve of CaPM.

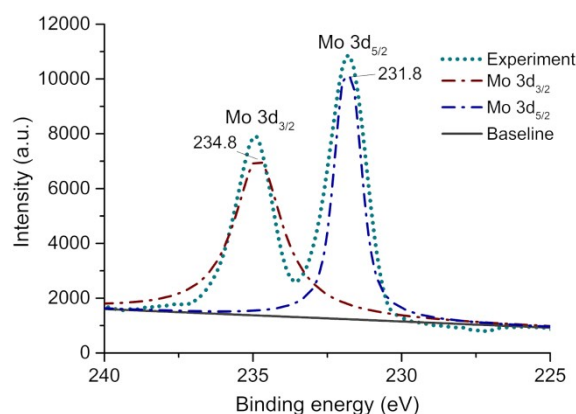

**Fig. S6** X-ray photoelectron spectrum (XPS) and the fitted curves of Mo in CaPM.

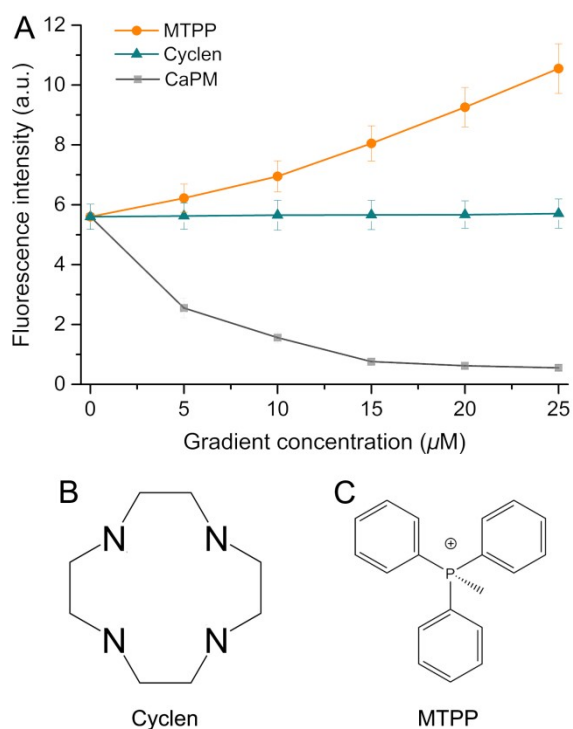

**Fig. S7** (A) The effect of CaPM, 1,4,7,10-tetraazacyclododecane (Cyclen) and methyltriphenylphosphonium bromide (MTPP) on the A $\beta$ 40 (20  $\mu\text{M}$ ) aggregates determined by ThT assay ( $\lambda_{\text{ex}} = 415 \text{ nm}$ ,  $\lambda_{\text{em}} = 480 \text{ nm}$ ). The structure diagram of Cyclen (B) and MTPP (C).

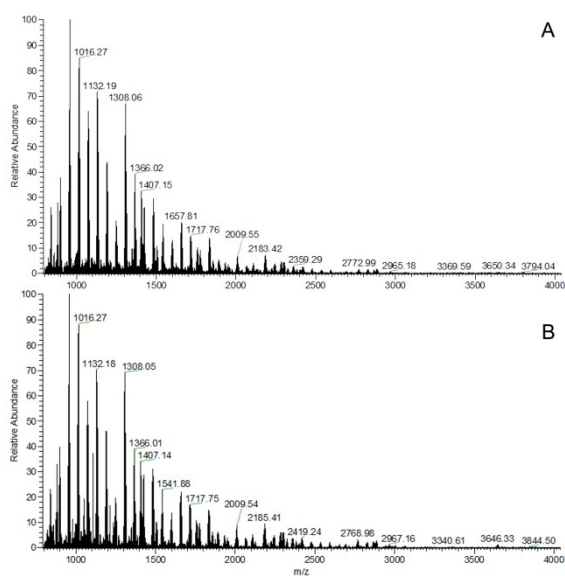

**Fig. S8** ESI-MS spectra of A $\beta$ 40 in the absence (A) and presence (B) of CaPM after incubation at 37  $^{\circ}\text{C}$  and pH 7.4 for 24 h.

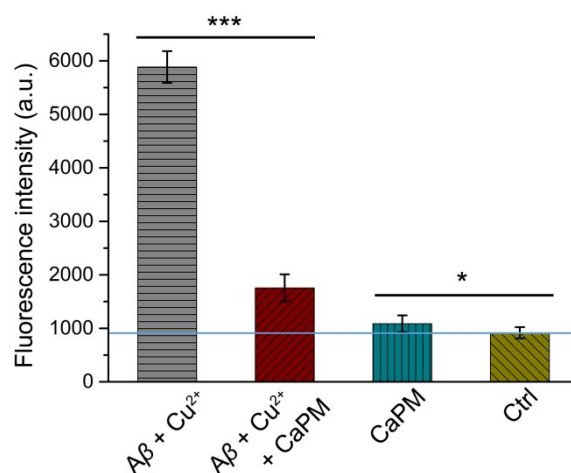

**Fig. S9** Fluorescence intensity of DCF ( $\lambda_{\text{ex}} = 485 \text{ nm}$ ,  $\lambda_{\text{em}} = 525 \text{ nm}$ ) incubated by  $\text{Cu}^{2+} + \text{A}\beta 40$ ,  $\text{Cu}^{2+} + \text{A}\beta 40 + \text{CaPM}$ , CaPM alone and control group for 24 h.

## 2. Materials and Methods

### 2.1 Materials

In this study, reagents used are all of analytical grade, and purchased from commercial suppliers and used as received unless otherwise stated. Human A $\beta$ 40 was purchased from Macklin agent Ltd. (China), which were verified by HPLC and electrospray ionization mass spectrometry (ESI-MS). 2',7'-dichlorofluorescein diacetate (DCFH-DA), 3-(4,5-dimethyl-2-thiazolyl)-2,5-diphenyl-2-H-tetrazolium bromide (MTT), nerve growth factor 7S (NGF-7S) and tris(hydromethyl)aminomethane (Tris) were purchased from Sigma-Aldrich Inc. (USA). Calcium chloride ( $\text{CaCl}_2$ ), sodium molybdate ( $\text{Na}_2\text{MoO}_4 \cdot 2\text{H}_2\text{O}$ ), trisodium phosphate ( $\text{Na}_3\text{PO}_3 \cdot 12\text{H}_2\text{O}$ ), potassium chloride (KCl), zinc acetate ( $\text{Zn}(\text{OAc})_2$ ), and copper(II) chloride ( $\text{CuCl}_2$ ) were purchased from Macklin agent Ltd. (China). Pheochromocytoma cells (PC12 cells) were purchased from American Type Culture Collection (ATCC). Stock solutions of A $\beta$ 40,  $\text{Zn}(\text{OAc})_2$  and  $\text{CuCl}_2$  were prepared according to the reported procedures.<sup>1</sup> All the solutions were prepared with Milli-Q water and filtered through a  $0.22 \mu\text{m}$  filter (Millipore).

## 2.2 Synthesis of $K_{11}[Ca_6P_6O_{12}(H_2O)_6][H_{0.5}PMo_6O_{28}]_2 \cdot 22H_2O$ (CaPM)

A mixture of  $Na_2MoO_4 \cdot 2H_2O$  (14.50 g, 60.0 mmol),  $Na_3PO_3 \cdot 12H_2O$  (22.80 g, 60.0 mmol),  $CaCl_2$  (9.85 g, 60.0 mmol) were dissolved in purified water (200 mL). The pH of above suspension was adjust to 5.60 by 0.1 M HCl. The solution reacts under reflux for 2 hours. After being cooled to room temperature, KCl (2.60 g, 35.0 mmol) was added and the solution was left to evaporate slowly at ambient temperature. After two weeks, colorless crystals of CaPM were obtained in 27 % yield (Based on  $Na_2MoO_4 \cdot 2H_2O$ ).

## 2.3 Physical measurements

DCF fluorescence were conducted on a Thermo Scientific Varioskan Flash microplate reader. The morphological analysis were examined on a JEOL JEM-2100 LaB6 (HR) transmission electron microscope. The CD spectrum of the sample solution was measured on a JASCO J-810 automatic recording spectropolarimeter (Tokyo, Japan). X-ray photoelectron spectrum (XPS) was tested on a PHI5000 VersaProbe instrument. The TGA was tested on a STA449F3 TG-DSC from 25 to 300 °C. The mass spectra were detected on an LCQ Fleet electrospray mass spectrometer from 800 to 4000 M/z. Powder X-Ray diffraction (PXRD) measurements were obtained using a Philips X'pert-MPD instrument with Cu-K $\alpha$  radiation ( $\lambda = 1.54056 \text{ \AA}$ ) at 293 K. UV spectra were recorded on a UV-3600 spectrometer. IR spectra were recorded in the range of 4000–400  $cm^{-1}$  on a Bruker Vector 22 FT-IR spectrophotometer using KBr pellets.

## 2.4 X-ray crystallography

Intensity data of single crystal was collected on a Bruker Apex-2 diffractometer with a CCD detector using graphite monochromatized Mo K $\alpha$  radiation ( $\lambda = 0.71073 \text{ \AA}$ ) at 296 K. Data integration was performed using *SAINT*.<sup>2</sup> Routine Lorentz and polarization corrections were applied. Multiscan absorption corrections were performed using *SADABS*.<sup>3</sup> The structure was solved by direct methods and refined using full-matrix least squares on  $F^2$ . The remaining atoms were found from successive full-matrix least-squares refinements on  $F^2$  and Fourier syntheses.



All calculations were performed using the SHELXL-97 program package.<sup>4</sup> No hydrogen atoms associated with the water molecules were located from the difference Fourier map. Positions of the hydrogen atoms attached to the carbon and nitrogen atoms were geometrically placed. All hydrogen atoms were refined isotropically as a riding mode using the default SHELXTL parameters. A summary of crystal data and structure refinements for CaPM is listed in Table S1.

### **2.5 Conformational modulation of A $\beta$**

ThT fluorescence assay: A $\beta$ 40 (20  $\mu$ M) in Tris buffer solution (20 mM Tris-HCl/150 mM NaCl, 990  $\mu$ L) was incubated with or without Zn(OAc)<sub>2</sub> (4  $\mu$ L, 10 mM) at 37 °C. Then, CaPM, 1,4,7,10-tetraazacyclododecane (Cyclen) and methyltriphenylphosphonium bromide (MTPP) (with the final concentration of 0–25  $\mu$ M) were added to each sample respectively and incubated at 37 °C for 24 h. Each sample (300  $\mu$ L) was injected to a well of a flat-bottomed 96-well black plate (Corning Costar Corp). ThT solution (2  $\mu$ L, 5 mM) was added to each well simultaneously in the dark and incubated at 37 °C for 1 h. The fluorescence intensity ( $\lambda_{\text{ex}} = 415$  nm,  $\lambda_{\text{em}} = 485$  nm) was recorded by a Varioskan Flash microplate reader (Thermo Scientific). Data were expressed as mean  $\pm$  standard deviations of at least three independent experiments.

Turbidity assay: Samples were prepared as described above. Each sample was infused to a well of a flat-bottomed 96-well transparent plate. Turbidity of the solutions were recorded using the absorbance at 405 nm. Data were expressed as mean  $\pm$  standard deviations of three independent experiments.

Morphological analysis: Samples were prepared in the same way as ThT fluorescence assay. A drop of solution (10  $\mu$ L) was spotted on the 300-mesh carbon-coated copper grids at room temperature. After 2 min, the excess solution was removed. The grids were stained with uranyl

acetate (10  $\mu$ L, 1%, w/v) for 2 min; Then, they were washed with Milli-Q water (10  $\mu$ L). The samples were examined on a JEOL JEM-2100 LaB6 (HR) transmission electron microscope.

CD spectra analysis: A $\beta$ 40 (20  $\mu$ M) was dissolved in the Tris buffer solution (20 mM Tris-HCl/150 mM NaCl) and incubated without or with Zn(OAc)<sub>2</sub> or CuCl<sub>2</sub> (40  $\mu$ M) at 37 °C, respectively. CaPM (20  $\mu$ M) was then dropped to each solution and incubated at 37 °C for another 24 h. The CD spectrum of the sample solution was measured on a JASCO J-810 automatic recording spectropolarimeter (Tokyo, Japan) in the range of 190–260 nm. The data acquired in the absence of protein was subtracted from the spectrum.

Mass spectrometry analysis: A $\beta$ 40 (20  $\mu$ M) was dissolved in the buffer solution (20 mM Tris-HCl/150 mM NaCl, pH 7.4, 996  $\mu$ L) and incubated with CaPM (4  $\mu$ L, 5 mM) at 37 °C for 24 h. The solution was loaded on the chromatographic column and the saline ions were washed off by Milli-Q water. The products were collected using an acid solution composed of 75% acetonitrile, 20% Milli-Q water and 5% acetic acid. The peptide solution was examined on an LCQ Fleet electrospray mass spectrometer.

## **2.6 Inhibition of ROS generation and neurotoxicity**

Inhibition of ROS generation: DCF stock solution (1 mM) and horseradish peroxidase (HRP) stock solution (4  $\mu$ M) were prepared with a Tris buffer (20 mM Tris-HCl/150 mM NaCl, pH 7.4) as described in the reported procedures.<sup>5</sup> Samples containing A $\beta$ 40 (20  $\mu$ M) and CuCl<sub>2</sub> (40  $\mu$ M) were incubated without or with CaPM (20  $\mu$ M) at 37 °C. Then, ascorbate solution (10  $\mu$ M) was added to each sample and incubated at 37 °C for 10 min. The samples (200  $\mu$ L) were injected to the wells of a flat-bottomed 96-well black plate. HRP (0.04  $\mu$ M) and DCF (100  $\mu$ M) were then injected to each solution and incubated in the dark at 37 °C. Fluorescence intensity ( $\lambda_{\text{ex}} = 485 \text{ nm}$ ,

$\lambda_{\text{ex}} = 650 \text{ nm}$ ) was measured by a Varioskan Flash microplate reader (Thermo Scientific) every 10 min from 0 to 2500 min. The other experimental groups were all analyzed according to the above method.

**Inhibition of neurotoxicity:** The PC12 cells used for the neurotoxicity, and synaptic dysfunction analysis were prepared as described in the previous literature.<sup>6</sup> The effects of CaPM on the inhibition neurotoxicity were evaluated by using the MTT assay. PC12 cells were incubated with A $\beta$ 40 (20  $\mu\text{M}$ ) alone or with Zn<sup>2+</sup>- or Cu<sup>2+</sup>(40  $\mu\text{M}$ )-induced A $\beta$ 40 complexes in absence or presence of CaPM (20  $\mu\text{M}$ ) for 24 h. Data were expressed as mean  $\pm$  standard deviations of at least three independent experiments.

**Cell morphological analysis:** The PC12 cells used for this morphological analysis were prepared as above. After incubation for 24 h, the morphological pictures of those cells were captured by a microscope.

**Statistical analysis:** The results are obtained from three independent experiments and presented as the mean  $\pm$  standard deviation of the independent experiments. The results were compared using a twoway ANOVA (\*  $p \leq 0.05$ , \*\*  $p \leq 0.01$ , \*\*\*  $p \leq 0.001$ ).

---

<sup>1</sup> X. H. Wang, X. Y. Wang, C. L. Zhang, Y. Jiao and Z. J. Guo, *Chem. Sci.*, 2012, **3**, 1304–1312.

<sup>2</sup> *Saint*. Bruker, AXS Inc., Madison WI **2007**.

<sup>3</sup> N. E. Brese and M. O’Keeffe, *Acta Crystallogr. B Struct. Sci.*, 1991, **47**, 192–197.

<sup>4</sup> G. M. Sheldrick, *SHEXTL-97, Programs for Crystal Structure Refinements*. University of Göttingen, Germany **1997**.

<sup>5</sup> M. Li, S. E. Howson, K. Dong, et al., *J. Am. Chem. Soc.*, 2014, **136**, 11655–11663.

<sup>6</sup> T. Yang, X. H. Wang, C. L. Zhang, X. Ma, K. Wang, Y. Q. Wang, J. Luo, L. Yang, C. Yao and X. Y. Wang, *Chem. Commun.*, 2016, **52**, 2245–2248.
